# Supplementary material for: Synthetic modulation of micro- and mesopores in polycyanurate networks for adsorptions of gases and organic hydrocarbons
Source: Royal Society of Chemistry journal article supplement (doi:10.1039/c6py02050j), 2017-01-01
Supplement: c6py02050j1.pdf [file c6py02050j1.pdf]

## Electronic Supplementary Information

### Synthetic modulation of micro- and mesopores in polycyanurate networks for adsorptions of gases and organic hydrocarbons

Changjiang Shen, Jun Yan, Gaoyang Deng, Biao Zhang and Zhonggang Wang\*

*State Key Laboratory of Fine Chemicals, Department of Polymer Science and Materials, School of Chemical Engineering, Dalian University of Technology, Dalian 116024, China*

Email: zgwang@dlut.edu.cn

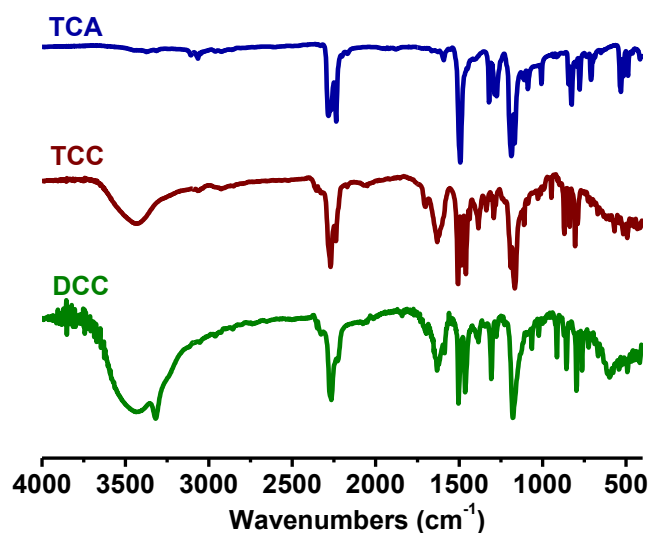

**Figure S1.** FTIR spectra of the three cyanate monomers.

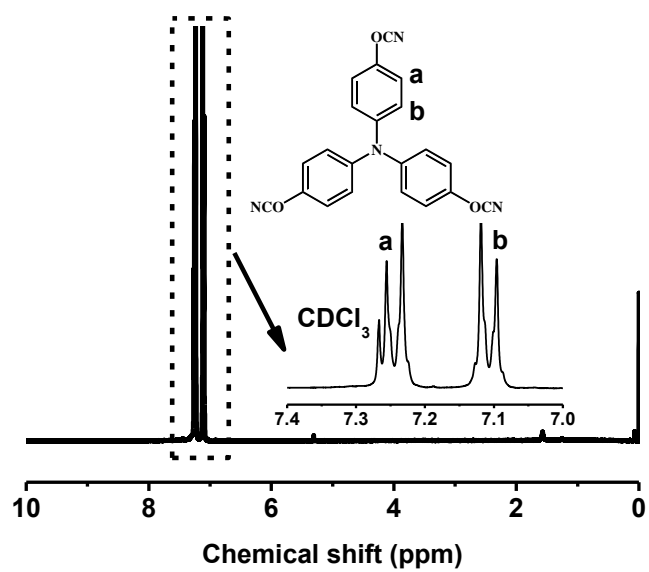

Figure S2.  $^1\text{H}$  NMR spectrum of TCA.

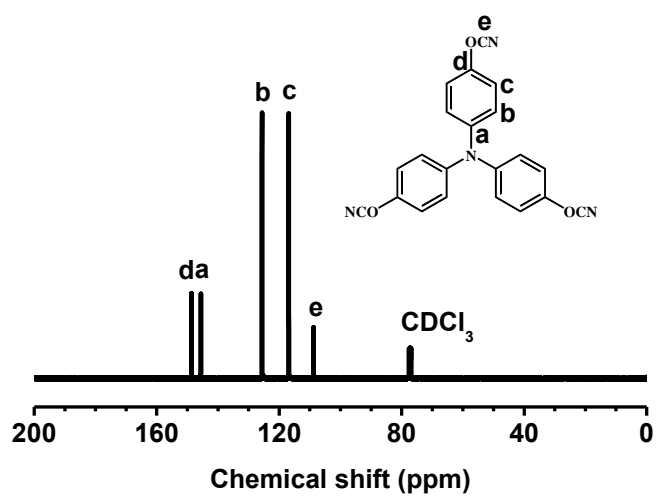

Figure S3.  $^{13}\text{C}$  NMR spectrum of TCA.

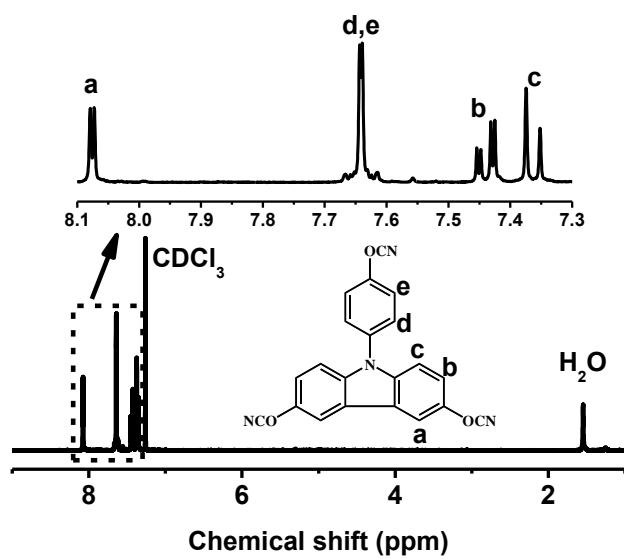

Figure S4.  $^1\text{H}$  NMR spectrum of TCC.

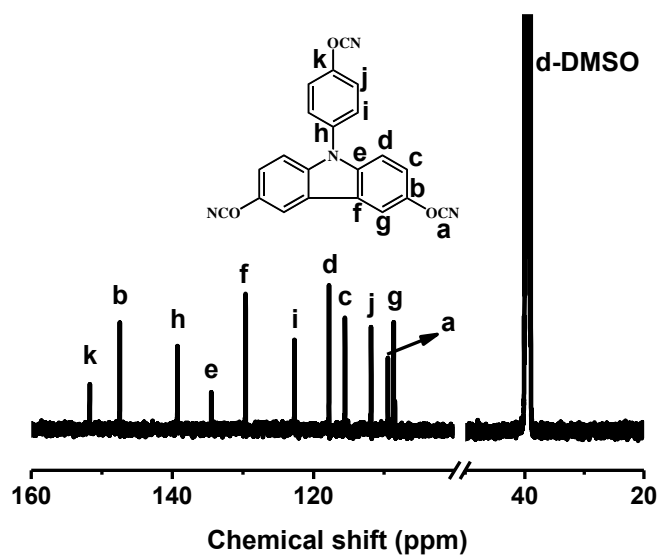

Figure S5.  $^{13}\text{C}$  NMR spectrum of TCC.

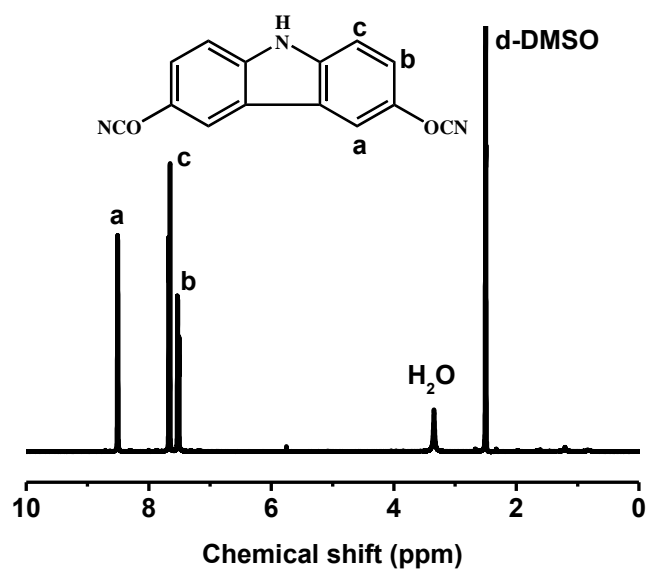

**Figure S6.** <sup>1</sup>H NMR spectrum of DCC.

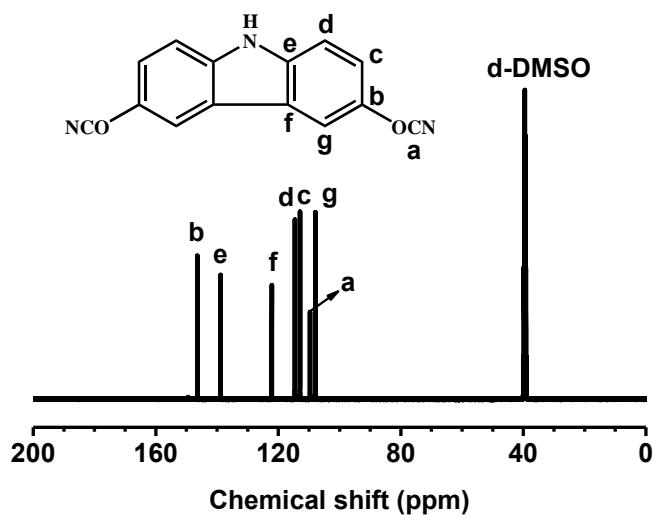

**Figure S7.** <sup>13</sup>C NMR spectrum of DCC.

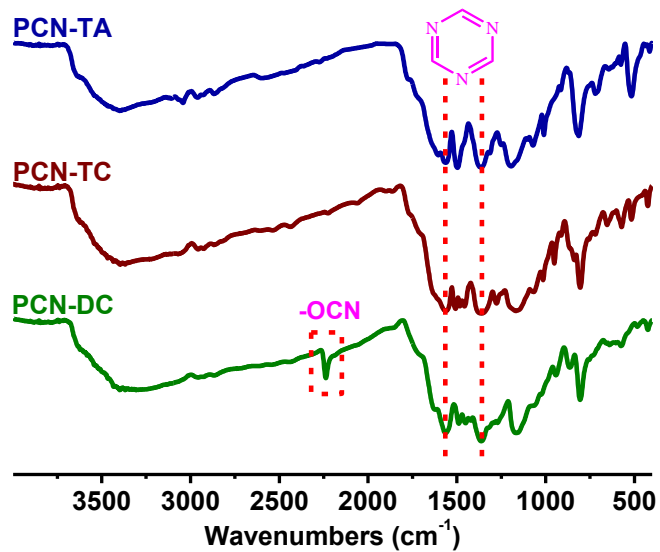

Figure S8. FTIR spectra of PCN-TA, PCN-TC and PCN-DC.

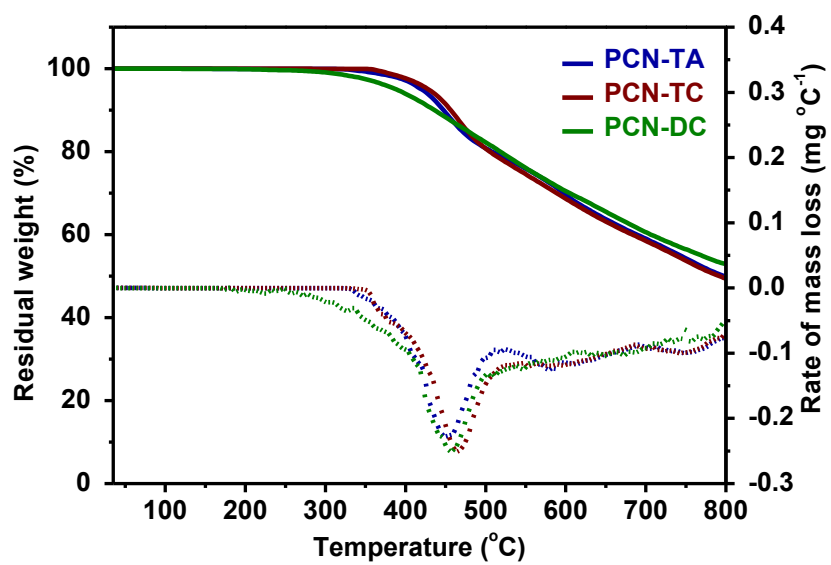

Figure S9. TGA and DTG curves of PCN-TA, PCN-TC and PCN-DC.

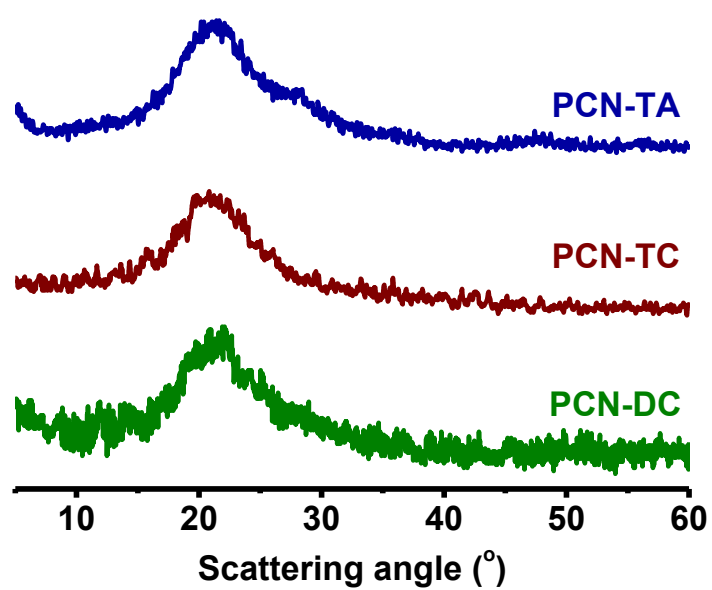

**Figure S10.** Wide angle X-ray diffraction patterns of PCN-TA, PCN-TC and PCN-DC.

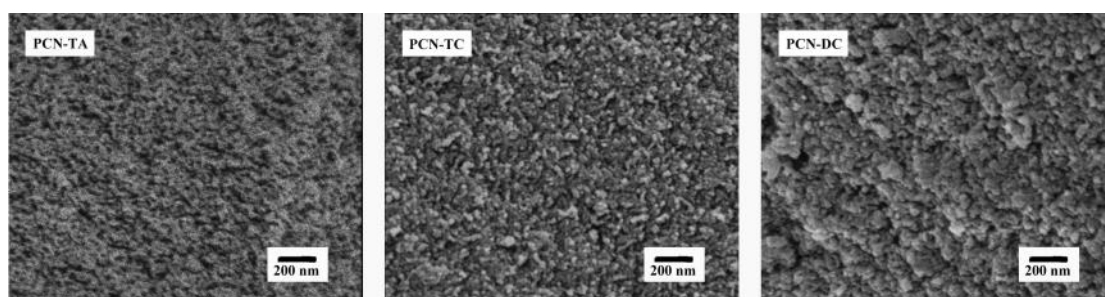

**Figure S11.** FE-SEM images of PCN-TA, PCN-TC and PCN-DC.

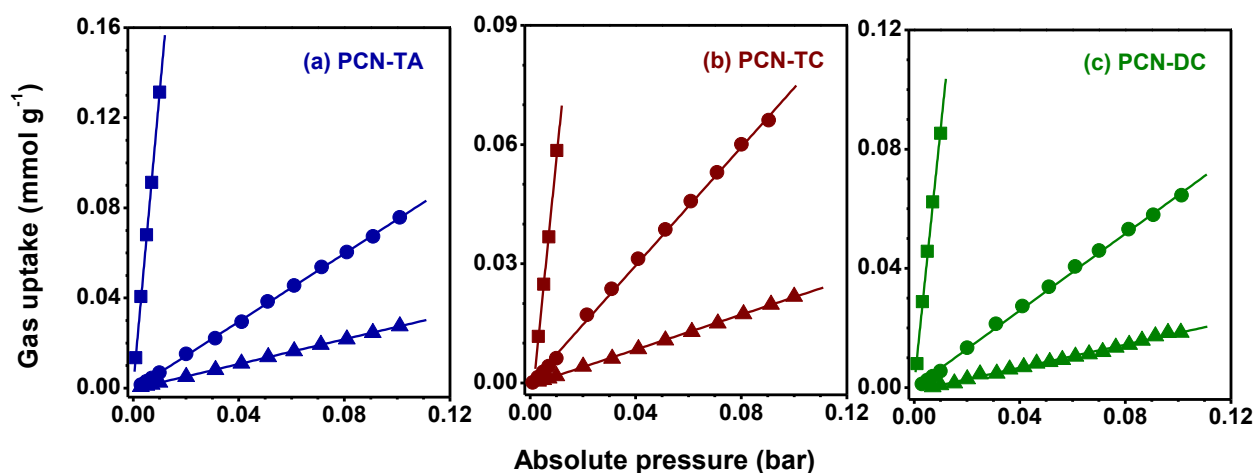

**Figure S12.** Adsorption selectivities of CO<sub>2</sub>/N<sub>2</sub> and CO<sub>2</sub>/CH<sub>4</sub> derived from the initial slopes of CO<sub>2</sub> (■), CH<sub>4</sub> (●) and N<sub>2</sub> (▲) adsorption isotherms at 273 K for PCN-TA (a), PCN-TC (b) and PCN-DC (c).

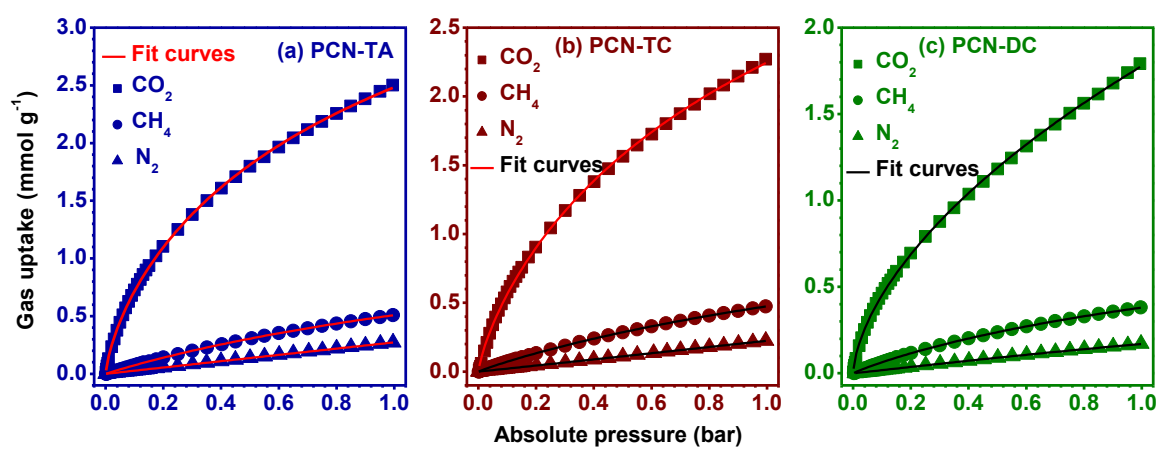

**Figure S13.** Experimental pure component isotherms for CO<sub>2</sub> (■), CH<sub>4</sub> (●) and N<sub>2</sub> (▲) at 273 K and their corresponding single-site Langmuir-Freundlich curves (solid black lines) for PCN-TA (a), PCN-TC (b) and PCN-DC (c).

Fig
